# Supplementary material
Source: PubMed Central journal article supplement (PMC4174924)
Supplement: 16eba76b58f6aaecdf1ac897e6cfe096_genetics.114.167577-6.pdf [file 16eba76b58f6aaecdf1ac897e6cfe096_genetics.114.167577-6.pdf]

**Table S1 Founder distribution patterns used for triplets in simulation.** The variance class of pairs of markers in the order X-Y, Y-Z, X-Z is given by Class.

|       | Low |   |   | Medium |   |   | High |   |   |
|-------|-----|---|---|--------|---|---|------|---|---|
|       | X   | Y | Z | X      | Y | Z | X    | Y | Z |
| A     | 1   | 1 | 1 | 1      | 1 | 1 | 1    | 1 | 1 |
| B     | 1   | 1 | 1 | 1      | 0 | 1 | 0    | 1 | 0 |
| C     | 0   | 0 | 0 | 1      | 0 | 1 | 1    | 1 | 1 |
| D     | 0   | 0 | 0 | 0      | 1 | 0 | 1    | 0 | 1 |
| Class | 1   | 1 | 1 | 3      | 3 | 2 | 4    | 4 | 2 |
